# Supplementary material for: The unique risk factor profile of triple-negative breast cancer: a comprehensive meta-analysis
Source: PubMed Central journal article supplement (PMC11308168; doi:10.1093/jnci/djae056), 2024-03-05

## Supplementary Figure 3: Example of risk of bias Assessment for the study Akinyemiju et al 2021

### Risk of Bias Assessment

**Scale/Tool:** Newcastle - Ottawa Quality Assessment Scale for Case Control Studies

**Study Authors:** Akinyemiju, et al 2021

**Study Title:** Association of body composition with odds of breast cancer by molecular subtype: analysis of the mechanisms for established and novel risk factors for breast cancer in Nigerian women (MEND) study

*Scoring criteria: A study can be awarded a maximum of one star (1 point) for each numbered item within the Selection and Exposure categories. A maximum of two stars (2 points) can be given for Comparability.*

#### Section A: Selection

- 1) Is the case definition adequate?
  - a) yes, with independent validation (if cases come from registry, laboratory data)
  - b) yes, eg record linkage or based on self-reports
  - c) **no description**
- 2) Representativeness of the cases
  - a) consecutive or obviously representative series of cases (star if cases come from geographic area or hospital)
  - b) **not stated**
- 3) Selection of Controls
  - a) **community controls \* (1 point)**
  - b) hospital controls
  - c) no description
- 4) Definition of Controls
  - a) **no history of disease (endpoint) \* (1 point)**
  - b) no description of source

#### Section B: Comparability

- 1) Comparability of cases and controls on the basis of the design or analysis
  - a) **study controls for Age \* (1 point)**
  - b) **study controls for additional factors (sociodemographic characteristics, reproductive history, and self and family history of cancer; anthropometric measurements) \* (1 point)**

#### Section C: Exposure

- 1) Ascertainment of exposure
  - a) secure record (eg surgical records)
  - b) structured interview where blind to case/control status
  - c) interview not blinded to case/control status
  - d) **medical record only**
  - e) no description
- 2) Same method of ascertainment for cases and controls
  - a) **yes \* (1 point)**
  - b) no
- 3) Non-Response rate
  - a) same rate for both groups (10% or less difference)
  - b) non respondents described
  - c) **rate different and no designation**

**SCORES:** Selection = 2 out of 4 (50%), Comparability = 2 out of 2 (100%), Exposure ascertainment = 1 out of 3 (0.33%)

**Supplementary Figure 4: Summary of Risk of Bias Assessment Scores for Included Studies**

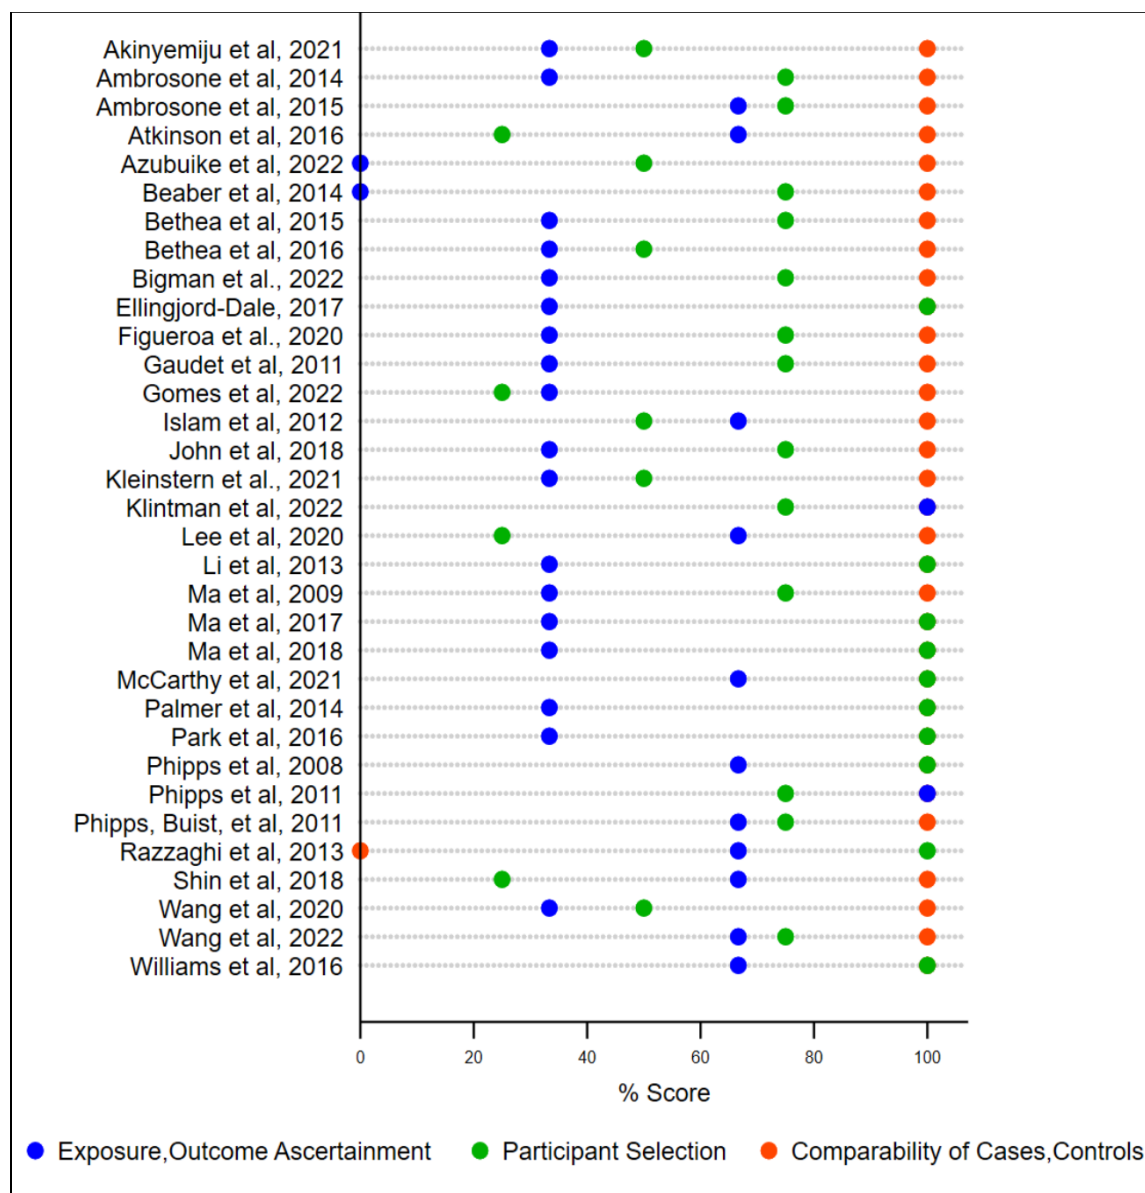

### Supplementary Figure 5 - a: Leave One Out Sensitivity Analysis for Parity

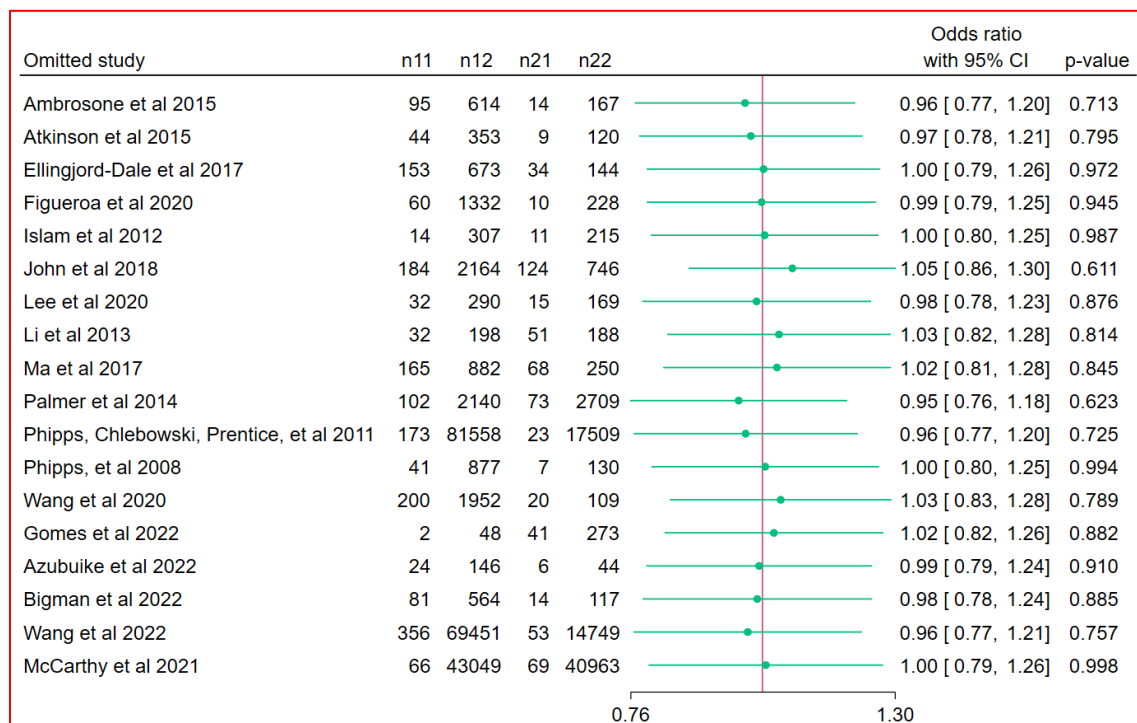

### Supplementary Figure 5 - b: Forest plot for Parity omitting Palmer et al 2014, John e al 2018

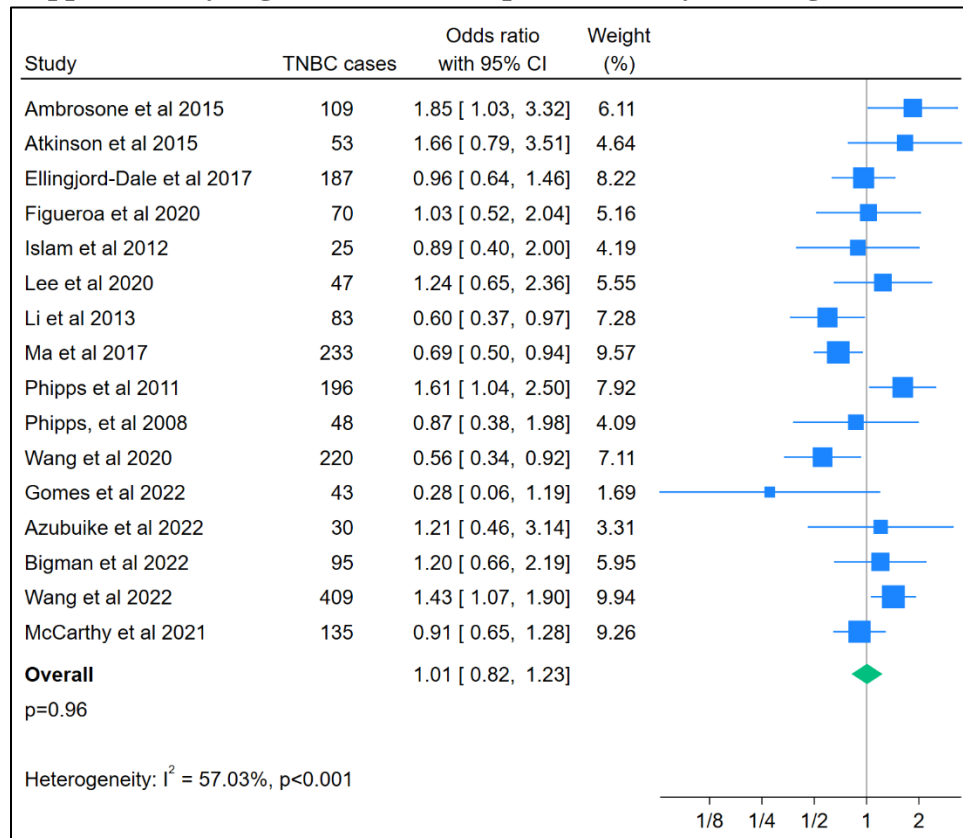

### Supplementary Figure 6 - a: Leave One Out Sensitivity Analysis for Breastfeeding (ever vs. never)

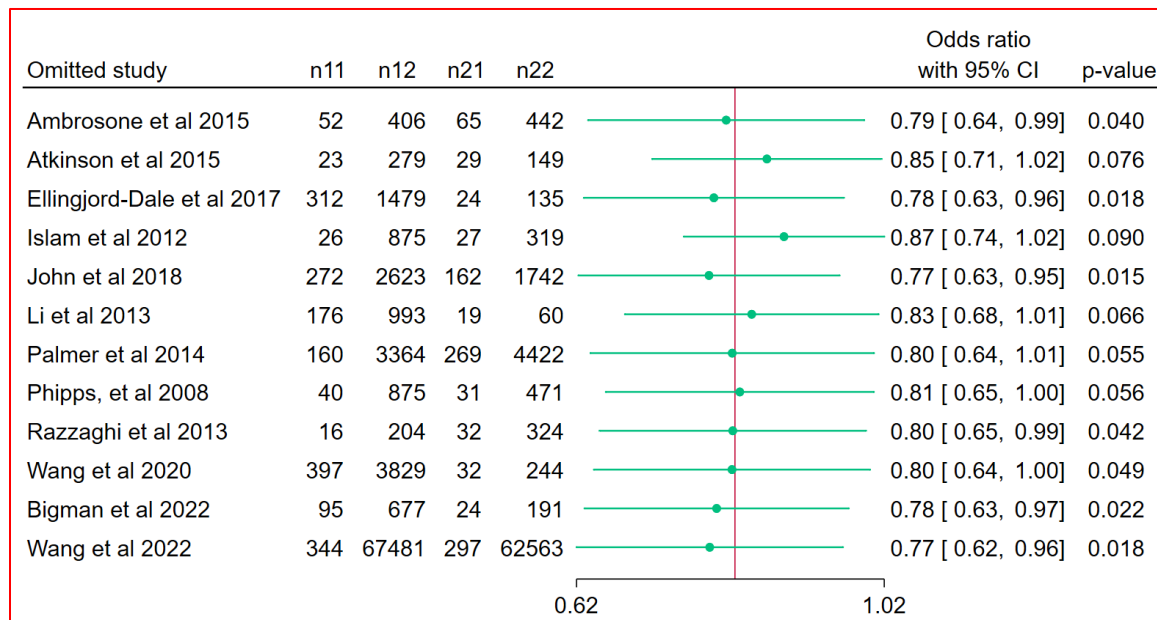

### Supplementary Figure 6 – b: Forest Plot for Breastfeeding after omitting Islam et al 2012 and Atkinson et al 2015

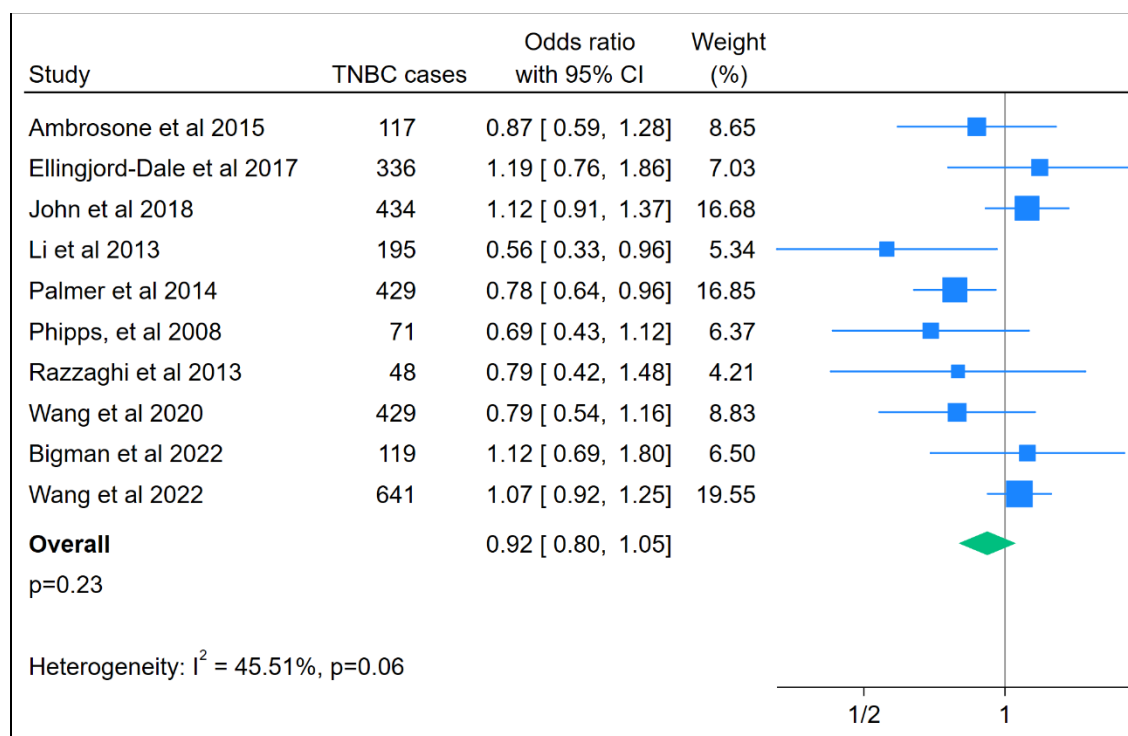

### Supplementary Figure 7-a: Leave One Out Sensitivity Analysis for Duration of Breastfeeding

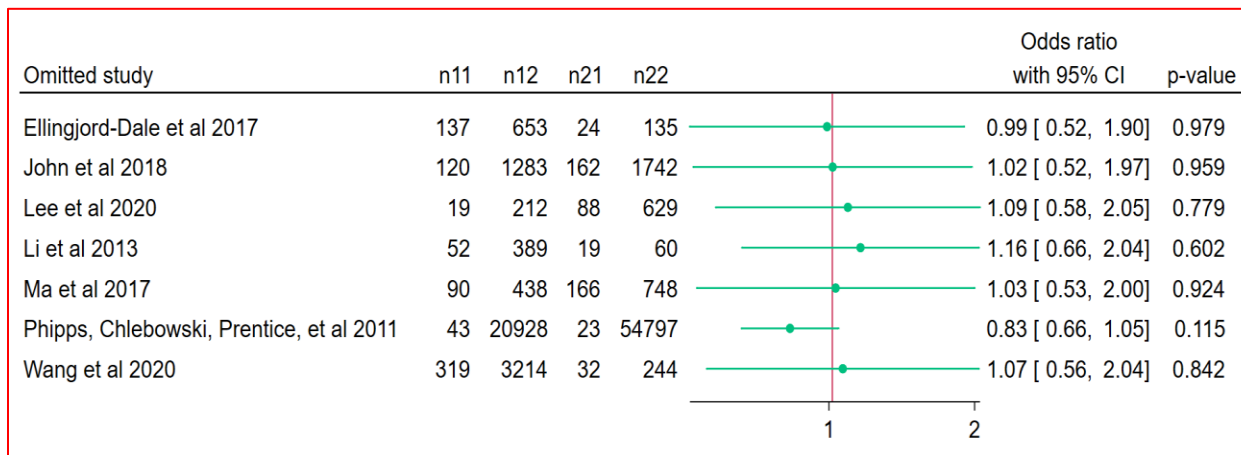

### Supplementary Figure 7-b: Forest Plot for Duration of Breastfeeding after omitting Phipps et al 2011

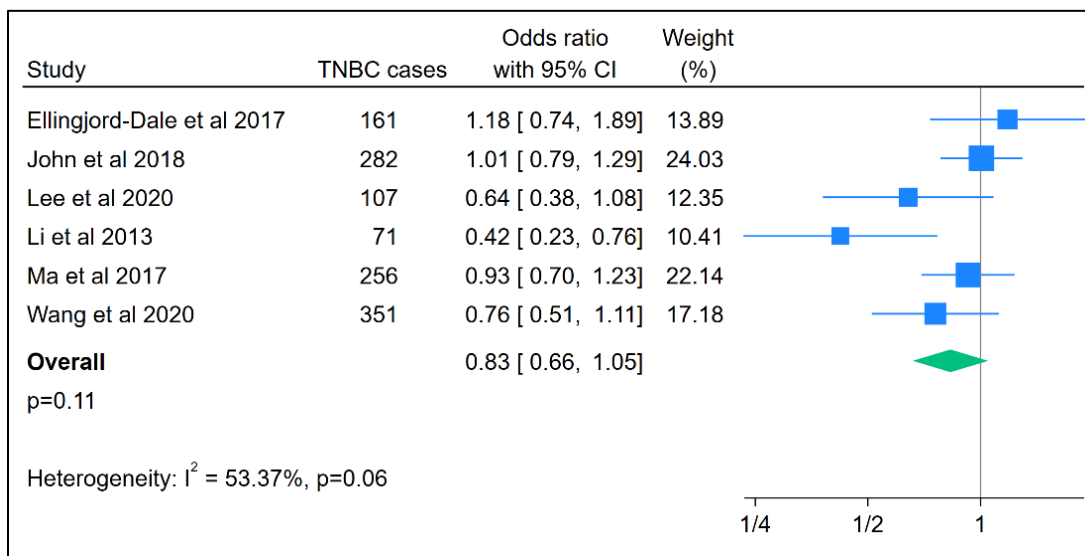

### Supplementary Figure 8: Leave One Out Sensitivity Analysis for Family History

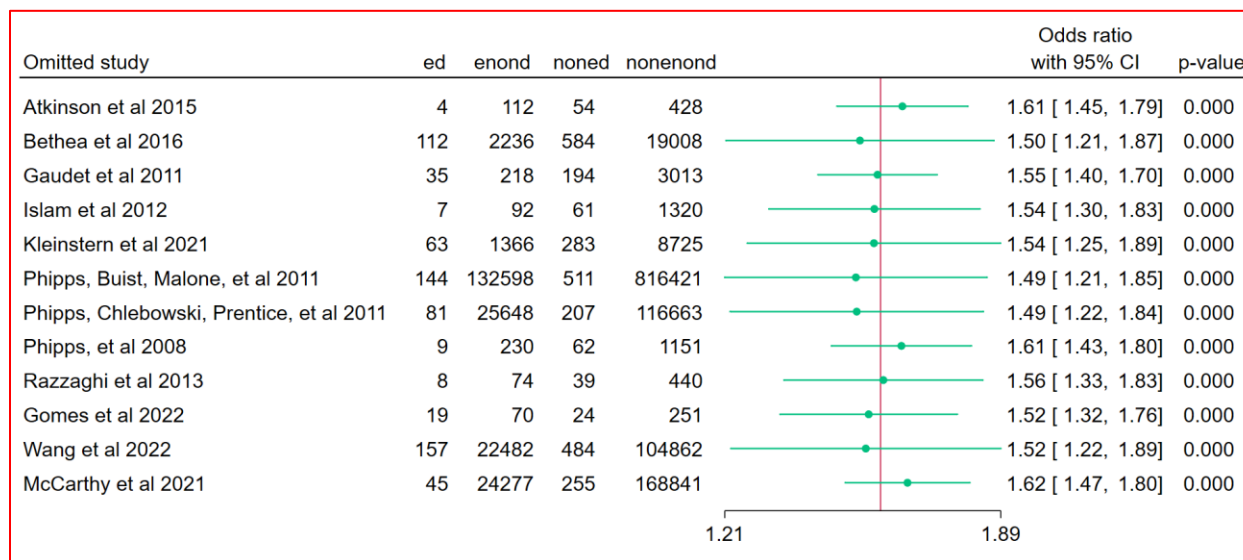

### Supplementary Figure 9: Leave One Out Sensitivity Analysis for Age at Menarche

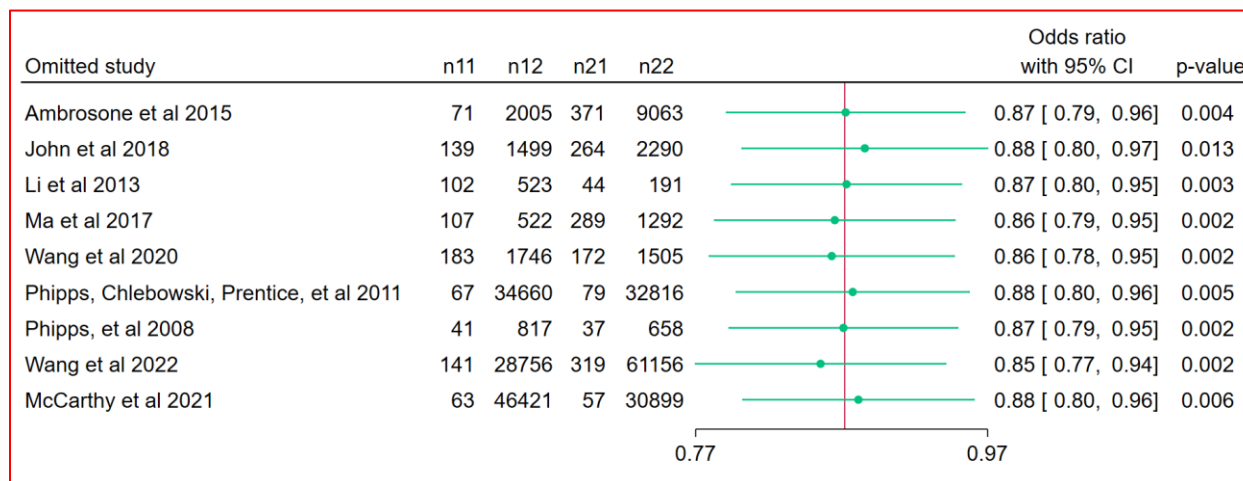

### Supplementary Figure 10: Leave One Out Sensitivity Analysis for Age at 1<sup>st</sup> Live Birth

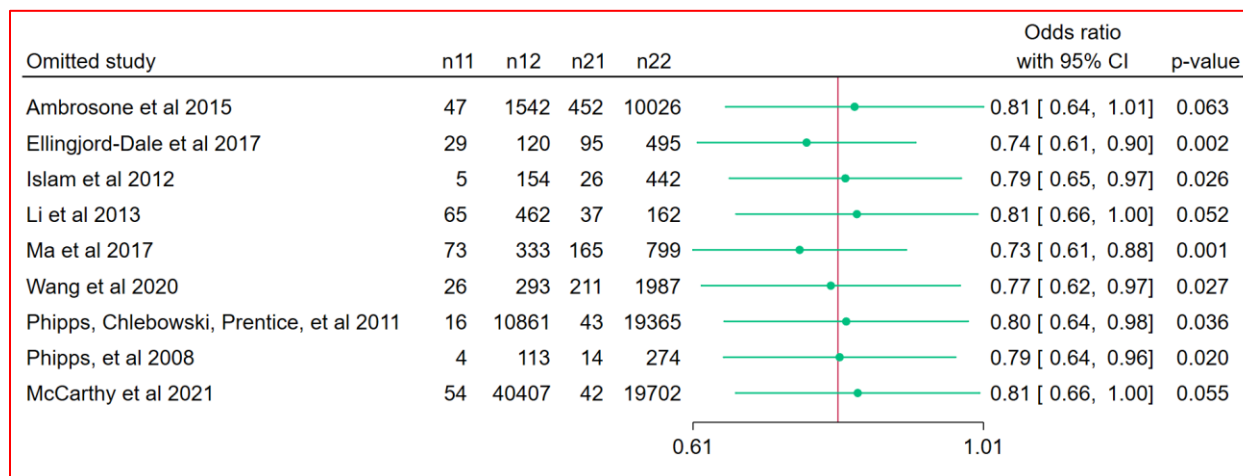

### Supplementary Figure 11a: Leave One Out Sensitivity Analysis for Oral Contraceptive Use

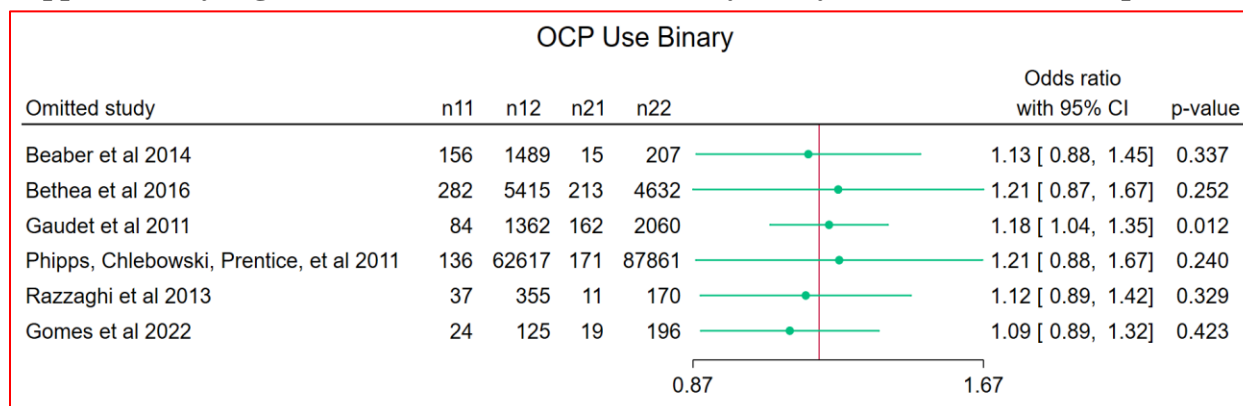

### Supplementary Figure 11b: Forest Plot for OCP Use after omitting Phipps et al 2011

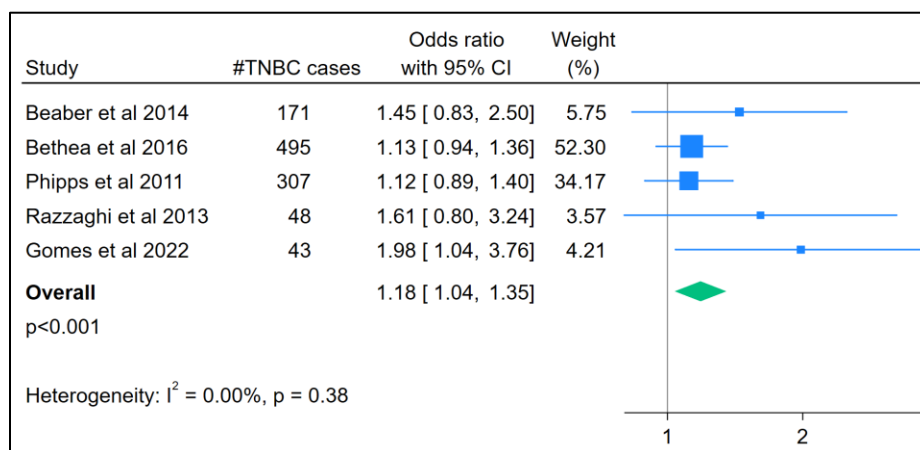







**Supplementary Figure 17-b Forest Plot for BMI after omitting Gomes et al 2022**

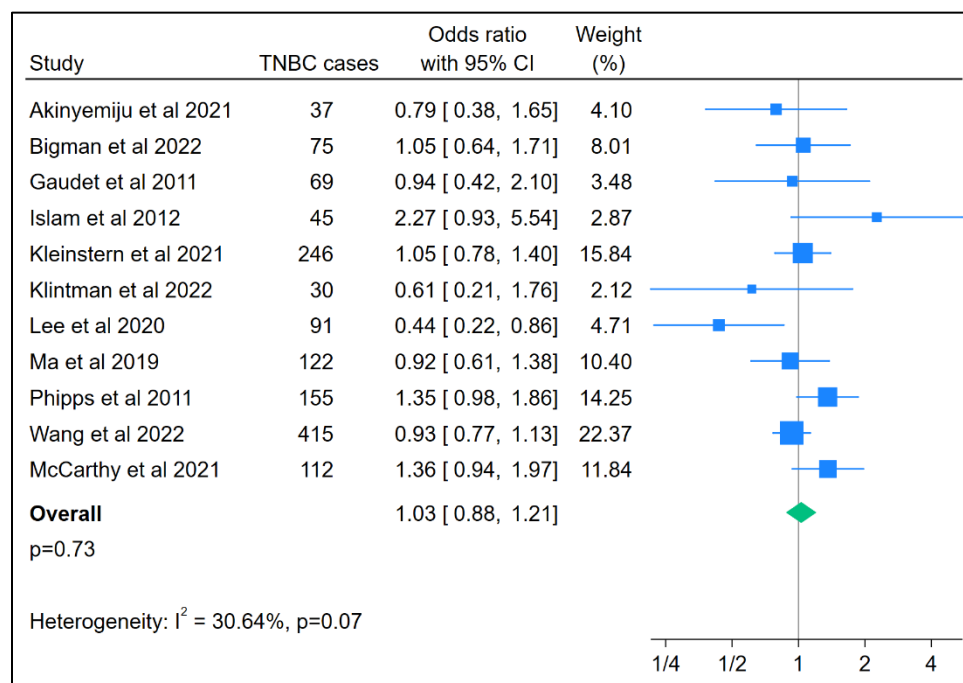

**Supplementary Figure 18: Parity - Contour Funnel Plot & Egger's test Assessment**

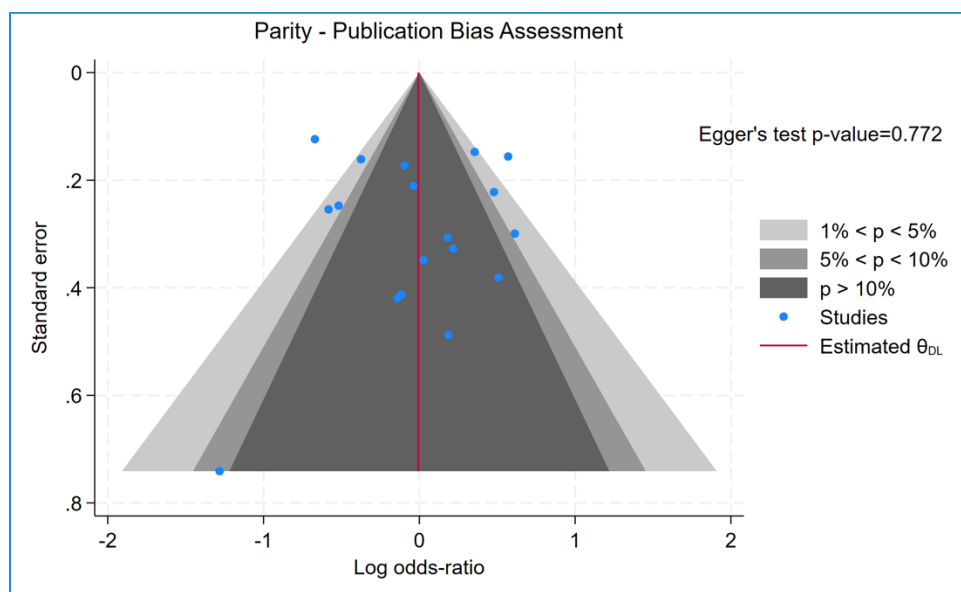

**Supplementary Figure 19 –a: Breastfeeding - Contour Funnel Plot and Egger’s Test Assessment**

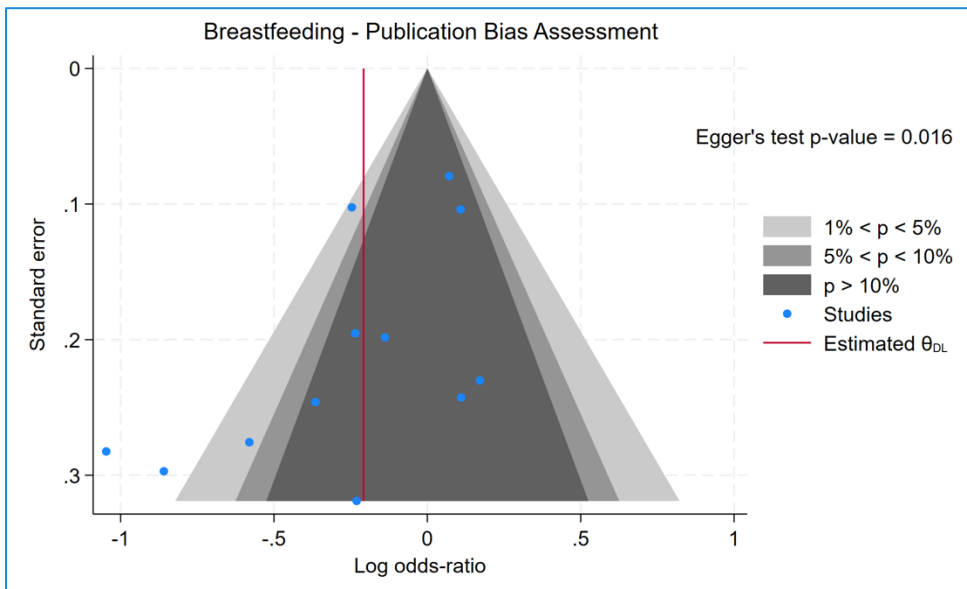

**Supplementary Figure 19-b: Breastfeeding - Trim and Fill Plot**

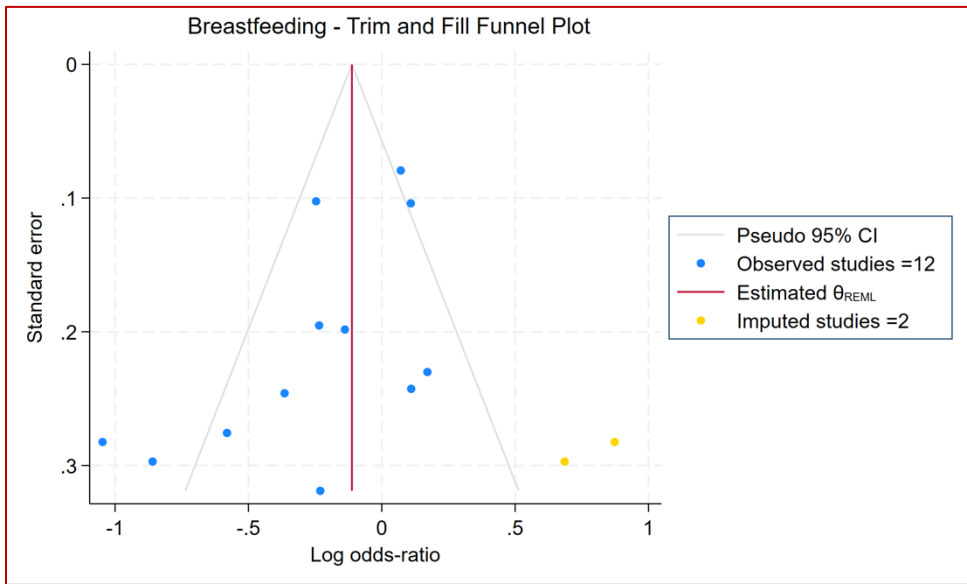

**Supplementary Figure 20: Duration of Breastfeeding - Contour Funnel Plot & Egger's test Assessment**

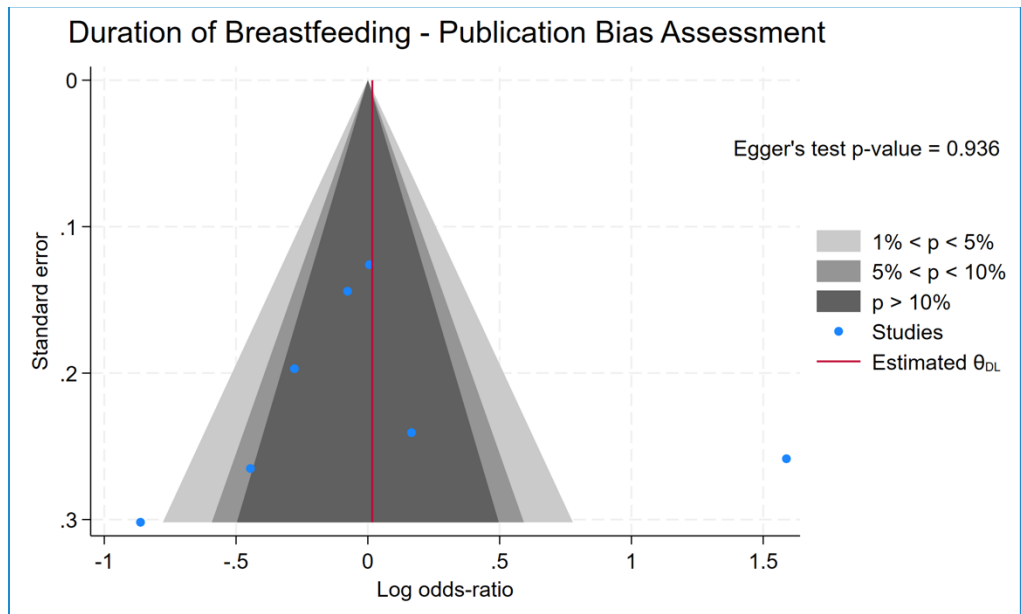

**Supplementary Figure 21: Age at Menarche - Contour Funnel Plot & Egger's test Assessment**

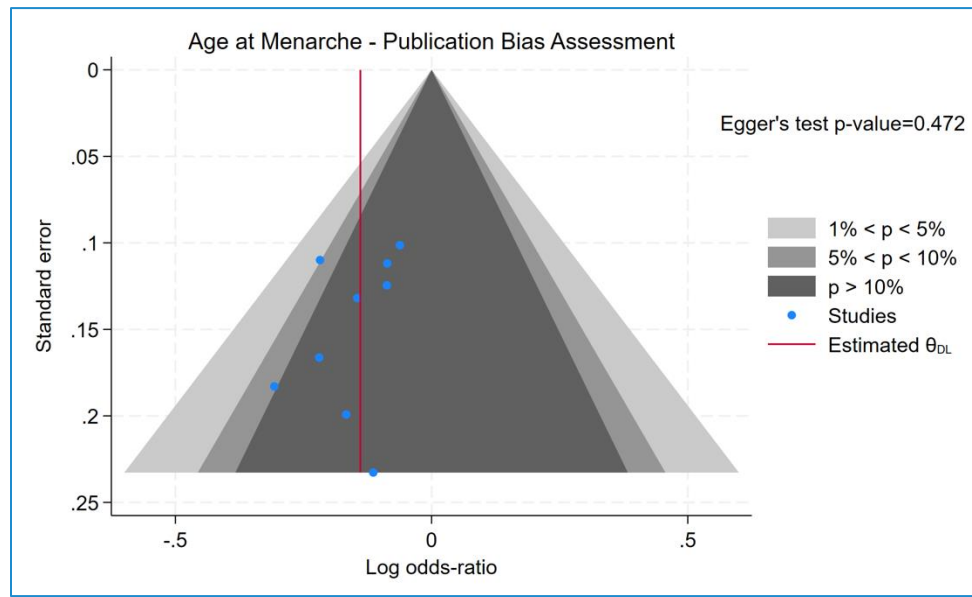

**Supplementary Figure 22: Age at 1st Live Birth - Contour Funnel Plot & Egger's test Assessment**

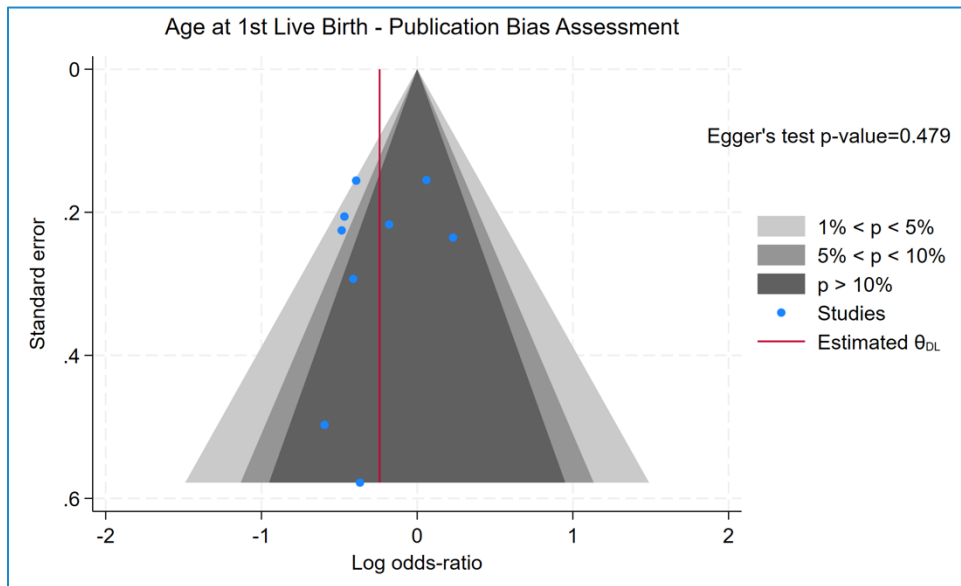

**Supplementary Figure 23: OC Use - Contour Funnel Plot & Egger's test Assessment**

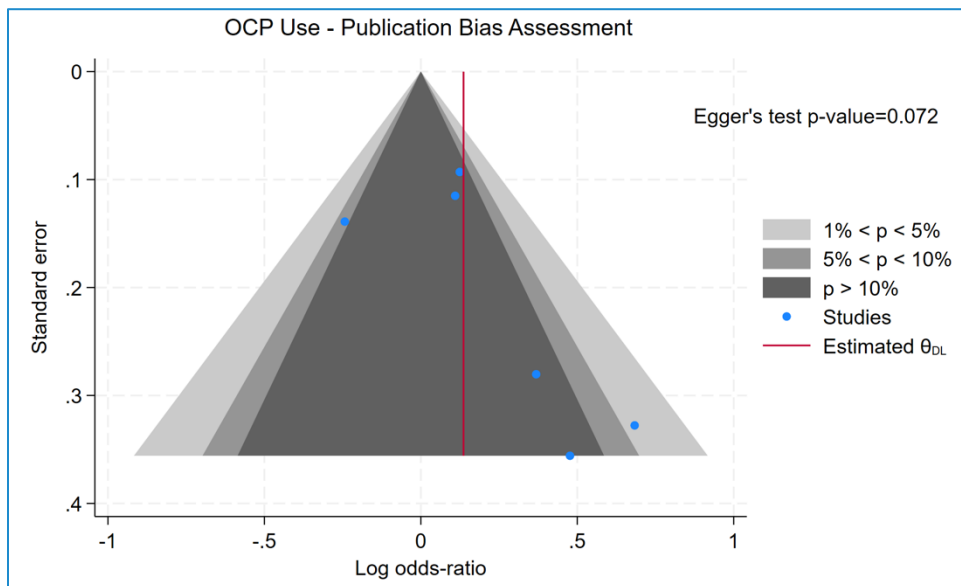

**Supplementary Figure 24: Duration of OC Use - Contour Funnel Plot & Egger's test Assessment**

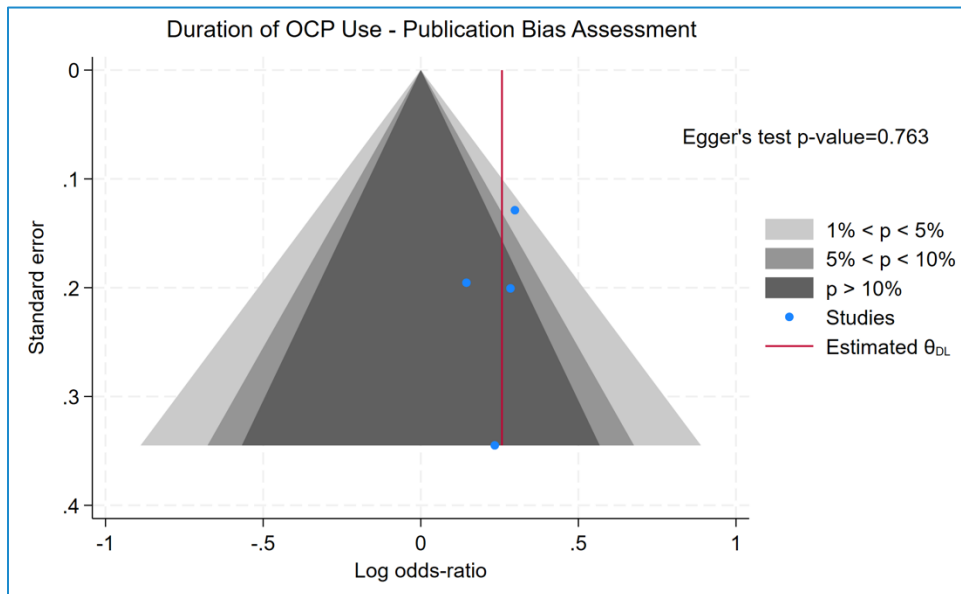

**Supplementary Figure 25-a: MHT Use - Contour Funnel Plot & Egger's test Assessment**

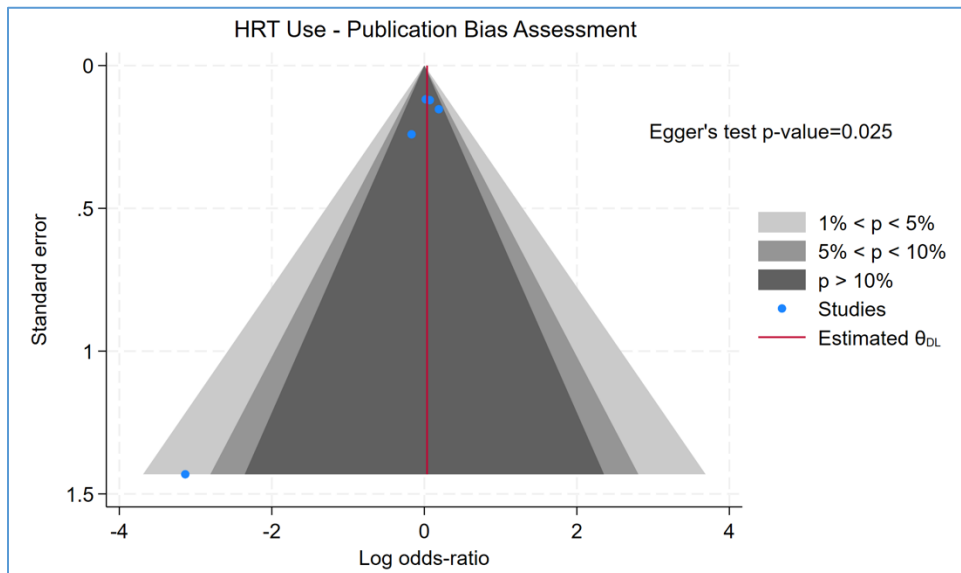

Supplementary Figure 25-b: MHT Use – Trim and Fill Plot

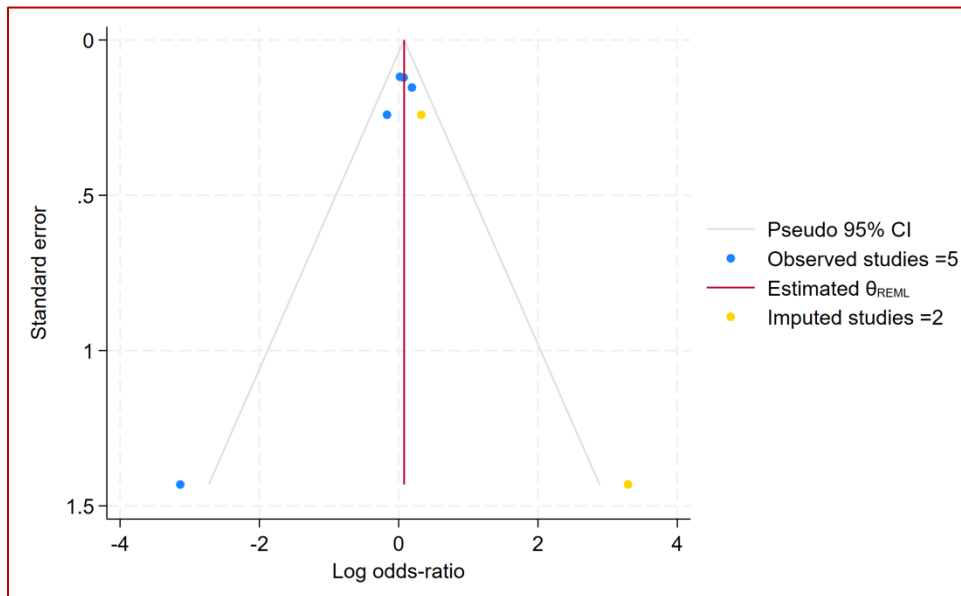

Supplementary Figure 26: Family History - Contour Funnel Plot & Egger's test Assessment

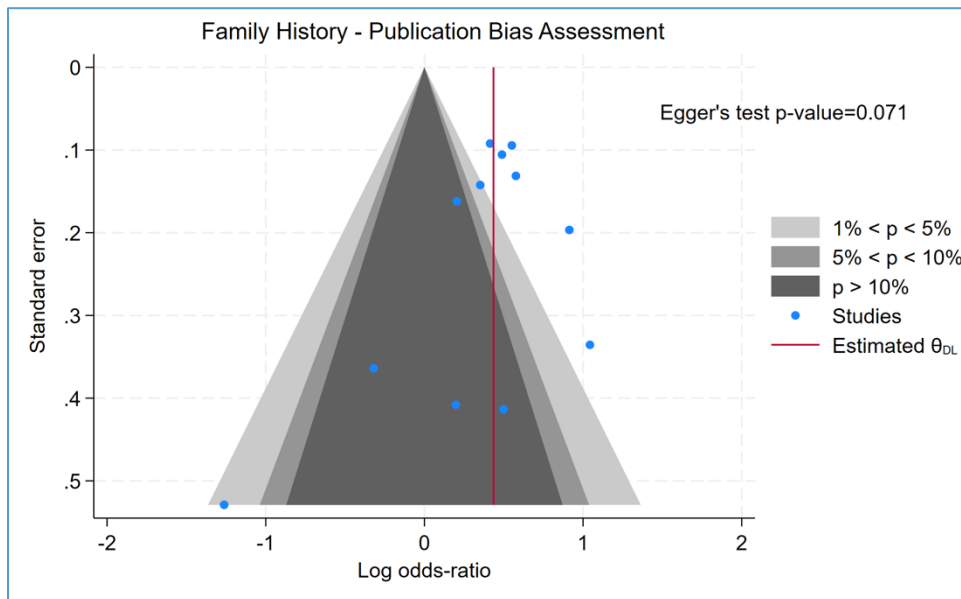



**Supplementary Figure 27: Alcohol - Contour Funnel Plot & Egger's test Assessment**

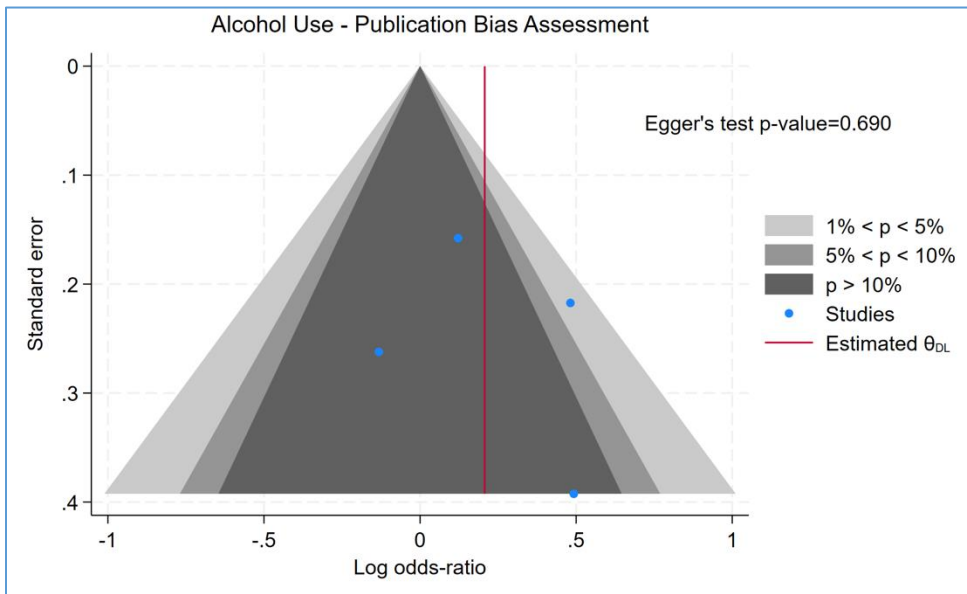

**Supplementary Figure 28: Smoking - Contour Funnel Plot & Egger's test Assessment**

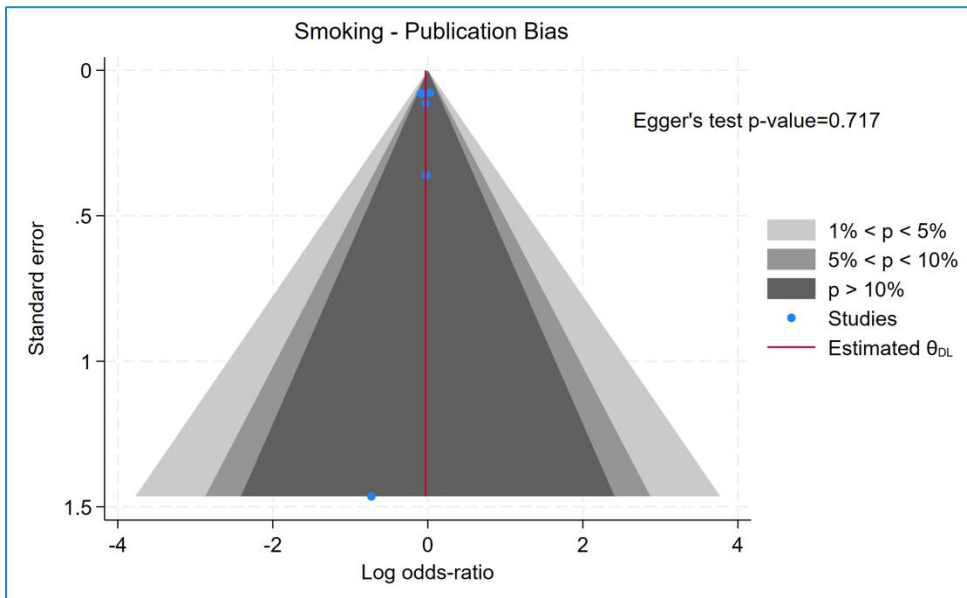

**Supplementary Figure 29: BMI - Contour Funnel Plot & Egger's test Assessment**

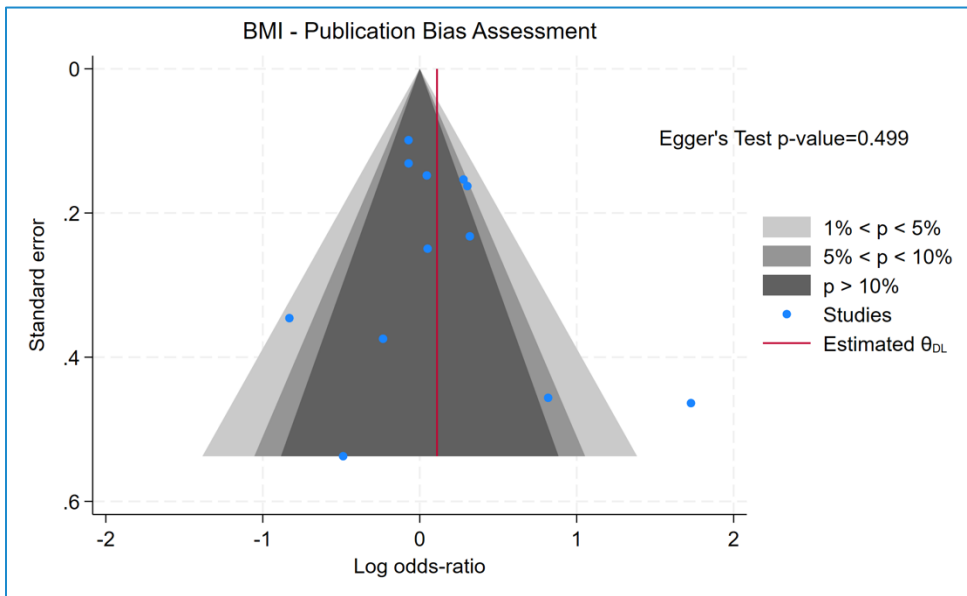

**Supplementary Figure 30: Breast Density - Contour Funnel Plot & Egger's test Assessment**

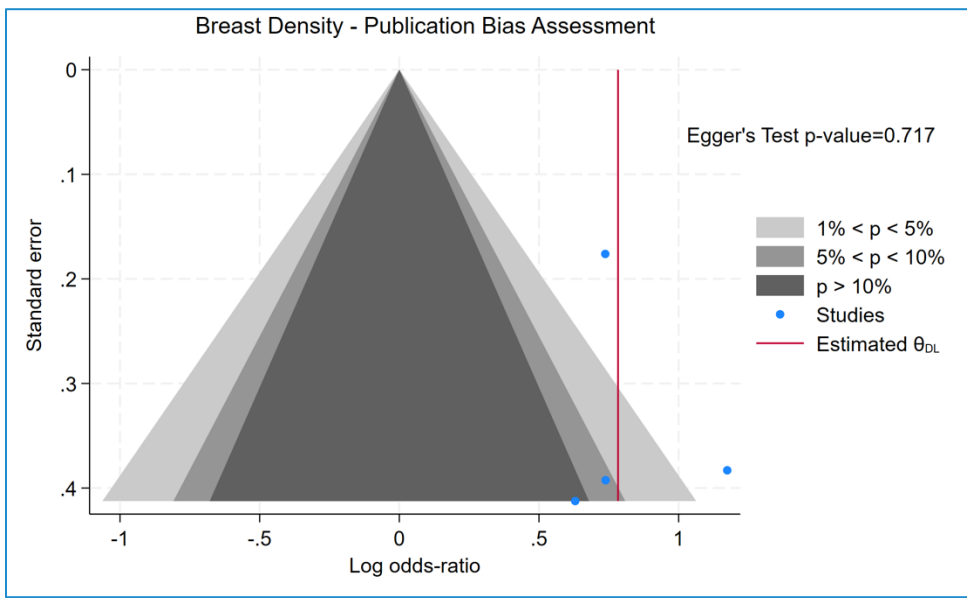

Supplementary Table 1: PRISMA Checklist

| #                   | Item                      | Guidance                                                                                                                                                                                                                                                                                                                                                                                                                                          | On page #  | Author Comments                                            |
|---------------------|---------------------------|---------------------------------------------------------------------------------------------------------------------------------------------------------------------------------------------------------------------------------------------------------------------------------------------------------------------------------------------------------------------------------------------------------------------------------------------------|------------|------------------------------------------------------------|
| <b>Title</b>        |                           |                                                                                                                                                                                                                                                                                                                                                                                                                                                   |            |                                                            |
| 1                   | Title                     | Identify the report as a systematic review, or systematic review and meta-analysis, as appropriate.                                                                                                                                                                                                                                                                                                                                               | Title page |                                                            |
| <b>Abstract</b>     |                           |                                                                                                                                                                                                                                                                                                                                                                                                                                                   |            |                                                            |
| 2                   | Structured summary        | Provide a structured summary including, as applicable: <ul style="list-style-type: none"> <li>• Background;</li> <li>• Objectives;</li> <li>• Data sources;</li> <li>• Study eligibility criteria, participants, and interventions;</li> <li>• Study appraisal and synthesis methods;</li> <li>• Results;</li> <li>• Limitations; conclusions and implications of key findings;</li> <li>• Systematic review registration number.</li> </ul>      | 2          |                                                            |
| <b>Introduction</b> |                           |                                                                                                                                                                                                                                                                                                                                                                                                                                                   |            |                                                            |
| 3                   | Rationale                 | Describe the rationale for the review in the context of what is already known.                                                                                                                                                                                                                                                                                                                                                                    | 3          |                                                            |
| 4                   | Objectives                | Provide an explicit Population-Intervention-Comparator-Outcome-Study Design (PICOS) or Population-Exposure-Comparator-Outcome-Study Design (PECOS) statement as appropriate, detailing the following in relation to the research questions being asked: <ul style="list-style-type: none"> <li>• Participants</li> <li>• Interventions / Exposures (as appropriate)</li> <li>• Comparisons</li> <li>• Outcomes</li> <li>• Study design</li> </ul> | 3          |                                                            |
| <b>Methods</b>      |                           |                                                                                                                                                                                                                                                                                                                                                                                                                                                   |            |                                                            |
| 5                   | Protocol and registration | Indicate if a review protocol exists, if and where it can be accessed (e.g. web address), and registration information including registration number (if available).                                                                                                                                                                                                                                                                              | 3          | Protocol Registration number: PROSPERO 2021 CRD42021254594 |
| 6                   | Eligibility criteria      | Specify study characteristics (e.g. PICOS/PECOS, length of exposure) and report characteristics (e.g. years considered, language, publication status) used as criteria for eligibility, giving rationale.                                                                                                                                                                                                                                         | 4          |                                                            |

|                |                                    |                                                                                                                                                                                                                                                  |        |  |
|----------------|------------------------------------|--------------------------------------------------------------------------------------------------------------------------------------------------------------------------------------------------------------------------------------------------|--------|--|
| 7              | Information sources                | Describe all information sources (e.g. databases with dates of coverage, contact with study authors to identify additional studies) in the search, and date last searched.                                                                       | 3      |  |
| 8              | Search                             | Present full electronic search strategy for at least one database, including any limits used, such that it could be repeated.                                                                                                                    | 3      |  |
| 9              | Study selection                    | State the process for selecting studies (i.e., screening, eligibility, included in systematic review, and, if applicable, included in the meta-analysis).                                                                                        | 4      |  |
| 10             | Data collection process            | Describe method of data extraction from reports (e.g., piloted forms, independently, in duplicate) and any processes for obtaining and confirming data from investigators.                                                                       | 5      |  |
| 11             | Data items                         | List and define all variables for which data were sought (e.g., PICOS/PECOS, funding sources) and any assumptions and simplifications made.                                                                                                      | 5      |  |
| 12             | Risk of bias in individual studies | Describe methods used for assessing risk of bias of individual studies (including specification of whether this was done at the study or outcome level), and how this information is to be used in any data synthesis.                           | 5      |  |
| 13             | Summary measures                   | State the principal summary measures (e.g., risk ratio, difference in means).                                                                                                                                                                    | 5      |  |
| 14             | Synthesis of results               | Describe the methods of handling data and combining results of studies, if done, including measures of consistency (e.g., $I^2$ ) for each meta-analysis.                                                                                        | 5      |  |
| 15             | Risk of bias across studies        | Specify any assessment of risk of bias that may affect the cumulative evidence (e.g., publication bias, selective reporting within studies).                                                                                                     | 5      |  |
| 16             | Additional analyses                | Describe methods of additional analyses (e.g., sensitivity or subgroup analyses, meta-regression), if done, indicating which were pre-specified.                                                                                                 | 5      |  |
| <b>Results</b> |                                    |                                                                                                                                                                                                                                                  |        |  |
| 17             | Study selection                    | Give numbers of studies screened, assessed for eligibility, and included in the review, with reasons for exclusions at each stage, illustrated with a PRISMA flow diagram.                                                                       | 6      |  |
| 18             | Study characteristics              | For each study, present in a summary table the characteristics for which data were extracted (e.g., study size, PICOS/PECOS, follow-up period) and provide the citations.                                                                        | 6      |  |
| 19             | Risk of bias within studies        | Present data on risk of bias of each study and, if available, any outcome level assessment (see item 12).                                                                                                                                        | 6      |  |
| 20             | Results of individual studies      | For all outcomes considered (benefits or harms), present, for each study: (a) simple summary data for each intervention group (b) effect estimates and confidence intervals, ideally with a forest plot (unless such a plot would be misleading) | 6 to 8 |  |
| 21             | Synthesis of results               | Present results of each meta-analysis done, including confidence intervals and measures of consistency.                                                                                                                                          | 6 to 8 |  |
| 22             | Risk of bias across studies        | Present results of any assessment of risk of bias across studies (see Item 15).                                                                                                                                                                  | 12     |  |

|    |                     |                                                                                                                                                                             |           |  |
|----|---------------------|-----------------------------------------------------------------------------------------------------------------------------------------------------------------------------|-----------|--|
| 23 | Additional analysis | Give results of additional analyses, if done (e.g., sensitivity or subgroup analyses, meta-regression [see Item 16]).                                                       | 6 to 8    |  |
| 24 | Summary of evidence | Summarize the main findings including the strength of evidence for each main outcome; consider their relevance to key groups (e.g., researchers, users, and policy makers). | 9         |  |
| 25 | Limitations         | Discuss limitations at study and outcome level (e.g., risk of bias), and at review-level (e.g., incomplete retrieval of identified research, reporting bias).               | 10 and 11 |  |
| 26 | Conclusions         | Provide a general interpretation of the results in the context of other evidence, and implications for future research.                                                     | 11        |  |
| 27 | Funding             | Describe sources of funding for the systematic review and other support (e.g., supply of data); role of funders for the systematic review.                                  | 18        |  |

**Supplementary Figure 31: Preferred Reporting Items for Systematic Reviews and Meta Analyses (PRISMA) Indicating Identification and Selection of Studies.**

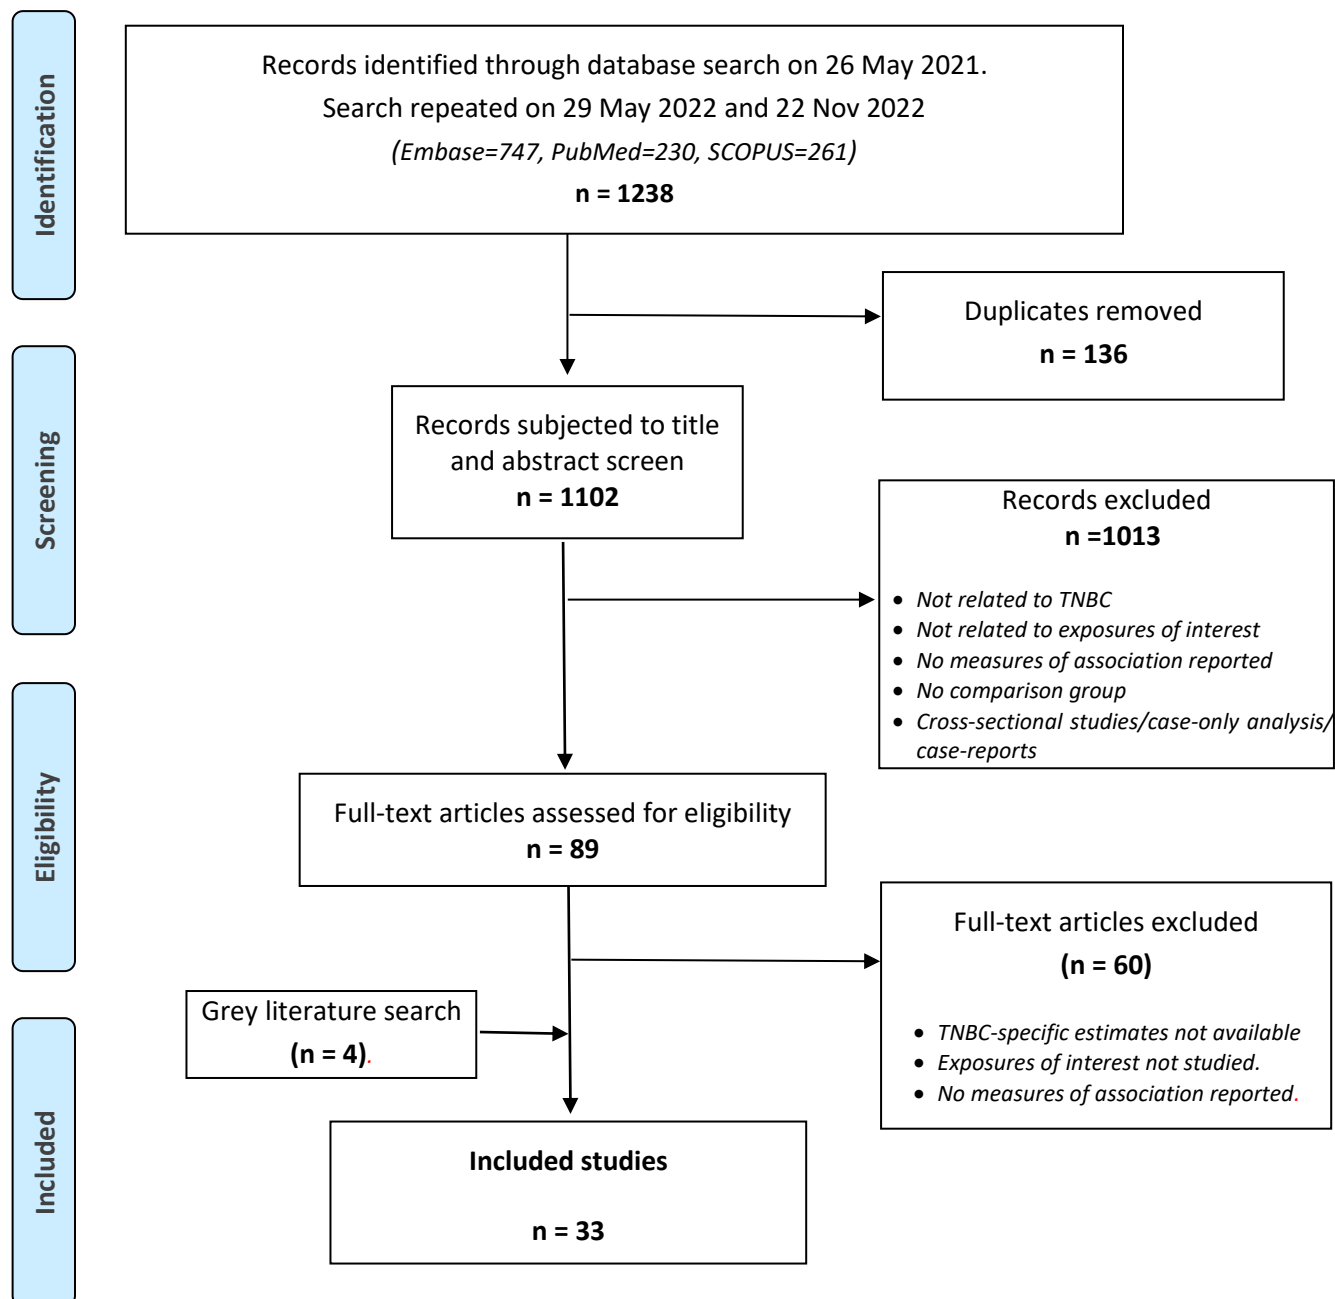

**Supplementary Figure 32: Odds of TNBC in those with  $\geq 12$  months of breastfeeding vs. 0 months.**

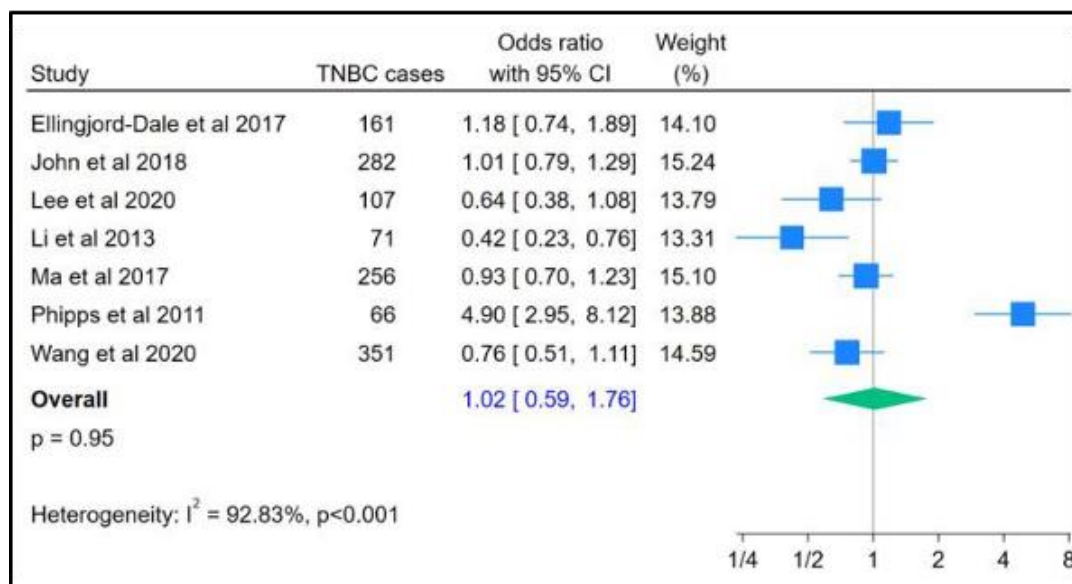

**Supplementary Figure 33: Odds of TNBC in those who ever used OC vs. those who never did.**

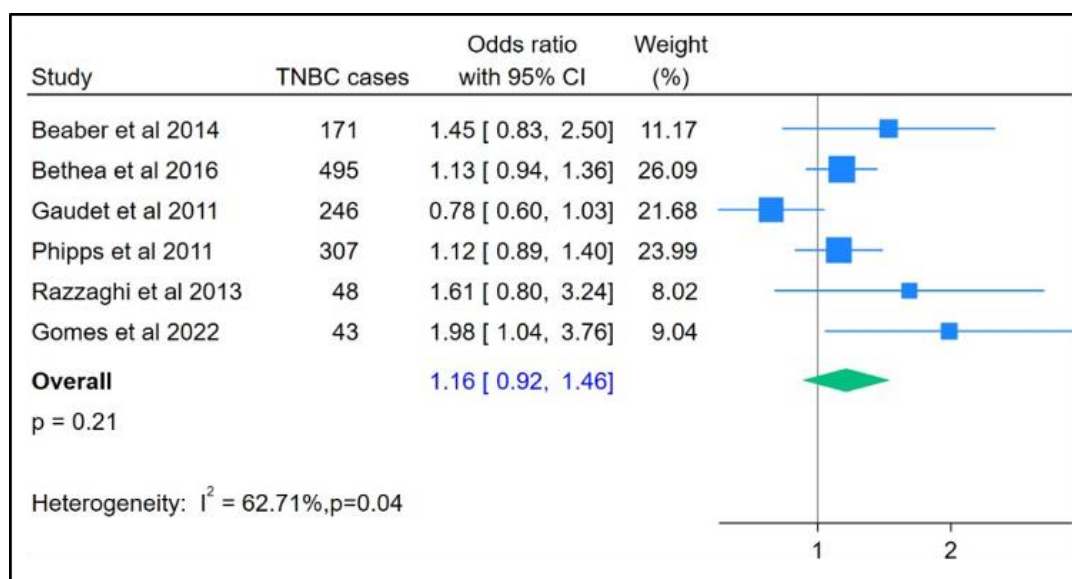

Supplement: djae056_supplementary_data.pdf [file djae056_supplementary_data.pdf]
